# Supplementary material for: FGF21 gene therapy as treatment for obesity and insulin resistance
Source: PubMed Central journal article supplement (PMC6079533; doi:10.15252/emmm.201708791), 2018-07-09
Supplement: EMMM-10-e8791-s001.pdf [file EMMM-10-e8791-s001.pdf]

## **Appendix**

### **FGF21 Gene Therapy as Treatment for Obesity and Insulin Resistance**

Veronica Jimenez\*, Claudia Jambrina\*, Estefania Casana, Victor Sacristan, Sergio Muñoz, Sara Darriba, Jordi Rodó, Cristina Mallof, Miquel Garcia, Xavier León, Sara Marcó, Albert Ribera, Ivet Elias, Alba Casellas, Ignasi Grass, Gemma Elias, Tura Ferré, Sandra Motas, Sylvie Franckhauser, Francisca Mulero, Marc Navarro, Virginia Haurigot, Jesus Ruberte and Fatima Bosch#.

**Appendix Figures S1-7.**

**Appendix Tables S1-S36.**

# Appendix Figure S1

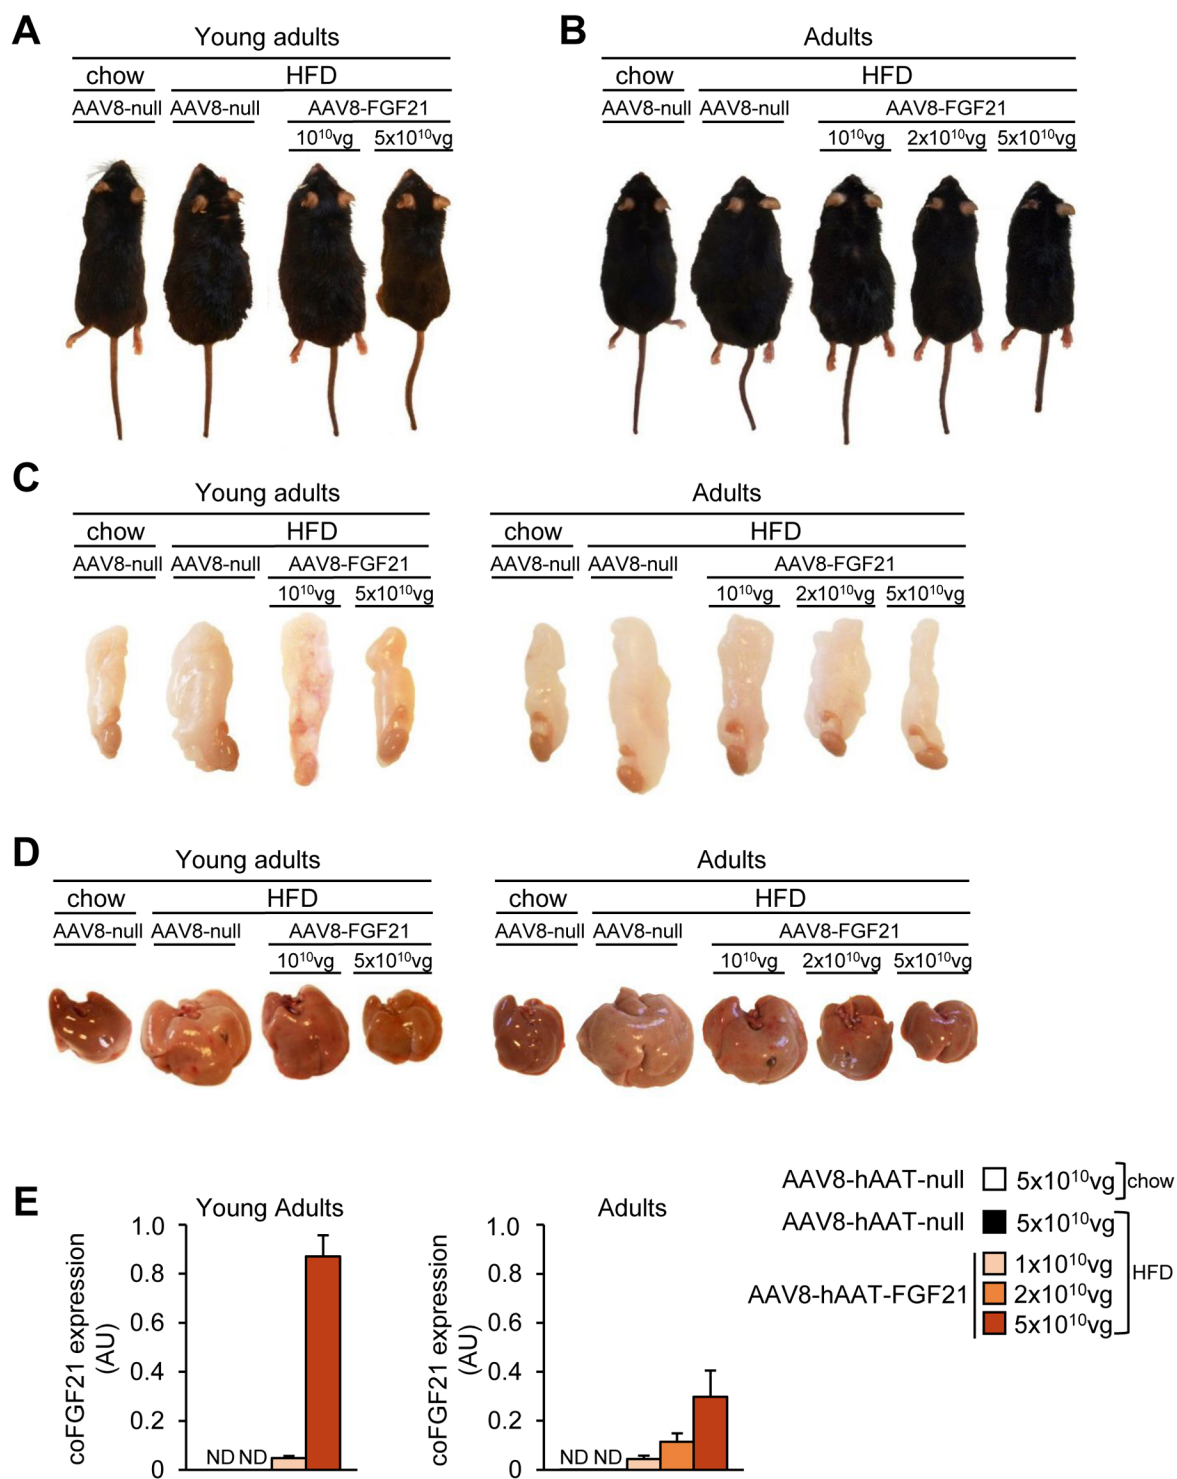

## Appendix Figure S1. FGF21 gene transfer to the liver counteracts HFD-induced obesity.

**A, B** Representative images of animals belonging to all experimental groups of the studies performed in young adults (A) or in adults (B).

**C** Representative images of the epididymal white adipose (eWAT) pad obtained at sacrifice from animals treated with several doses of AAV8-hAAT-FGF21 as young adults (left) or adults (right).

**D** Representative images of the liver obtained from animals treated as young adults (left) or adults (right).

**E** AAV-derived FGF21 expression in the liver of animals treated as young adults or adults. The qPCR was performed with primers that specifically detected the codon-optimized FGF21 (coFGF21) coding sequences.

Data information: All values are expressed as mean ± SEM. In (E) Young adults: AAV8-hAAT-null chow (n=10 animals), AAV8-hAAT-null HFD (n=8), AAV8-hAAT-FGF21 HFD 1x10<sup>10</sup> vg (n=9) and 5x10<sup>10</sup> vg (n=8). Adults: AAV8-hAAT-null chow (n=7), AAV8-hAAT-null HFD (n=7), AAV8-hAAT-FGF21 HFD 1x10<sup>10</sup> vg (n=7), 2x10<sup>10</sup> vg (n=8) and 5x10<sup>10</sup> vg (n=7). HFD, High-fat diet.

# Appendix Figure S2

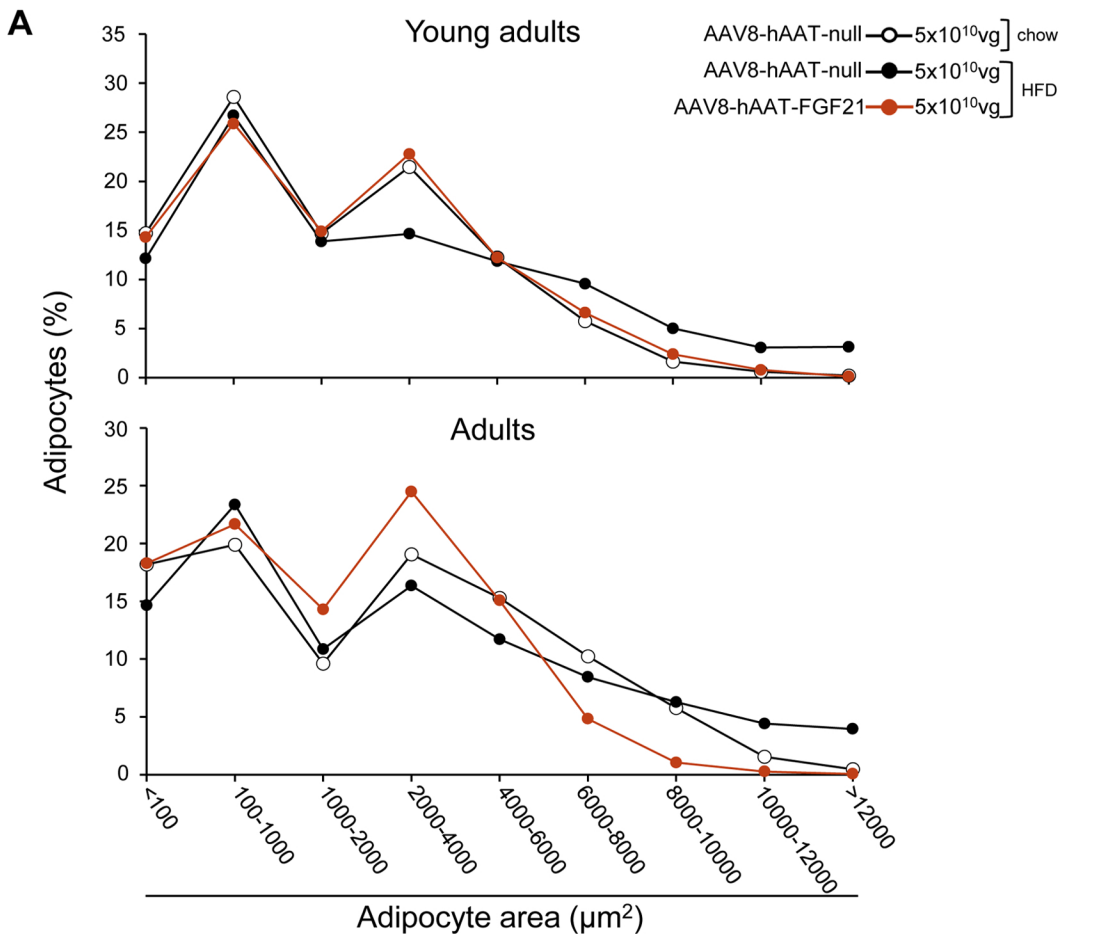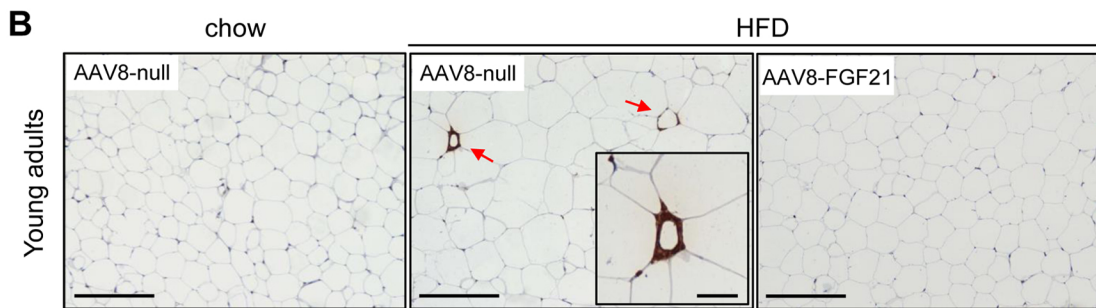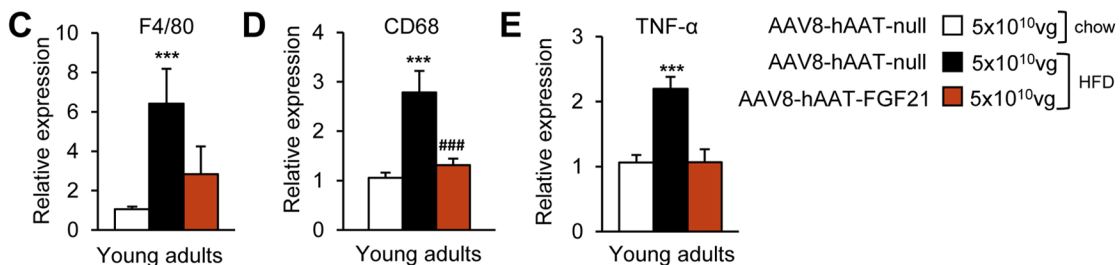

## Appendix Figure S2. Adipocyte size and inflammation in AAV8-hAAT-FGF21-treated animals.

**A** Frequency distribution of adipocyte area in the groups of animals that initiated the chow or HFD feeding and received either AAV8-hAAT-null or  $5 \times 10^{10}$  vg/mouse AAV8-hAAT-FGF21 vectors as young adults (top graph) or adults (bottom graph).

**B** Mac2 immunohistochemistry in eWAT of animals in which the study was initiated as young adults. The crown-like structures formed by infiltrating macrophages in the eWAT of HFD-fed, null-injected mice are indicated by red arrows. Scale bars: 200  $\mu\text{m}$  and 50  $\mu\text{m}$  (inset).

**C-E** Relative expression by qRT-PCR of the markers of inflammation F4/80 (C), CD68 (D) and TNF- $\alpha$  (E) in the same cohort of animals as in (B).

Data information: All values are expressed as mean  $\pm$  SEM. In (A)  $n=4$  animals/group. In (C-E) Young adults: AAV8-hAAT-null chow ( $n=10$  animals), AAV8-hAAT-null HFD ( $n=8$ ), AAV8-hAAT-FGF21 HFD  $1 \times 10^{10}$  vg ( $n=9$ ) and  $5 \times 10^{10}$  vg ( $n=8$ ). Adults: AAV8-hAAT-null chow ( $n=7$ ), AAV8-hAAT-null HFD ( $n=7$ ), AAV8-hAAT-FGF21 HFD  $1 \times 10^{10}$  vg ( $n=7$ ),  $2 \times 10^{10}$  vg ( $n=8$ ) and  $5 \times 10^{10}$  vg ( $n=7$ ). In (A-E) data were analyzed by one-way ANOVA with Tukey's post hoc correction. \*\*\* $P < 0.001$  versus the chow-fed Null-injected group. ### $P < 0.001$  versus the HFD-fed Null-injected group. HFD, High-fat diet.

# Appendix Figure S3

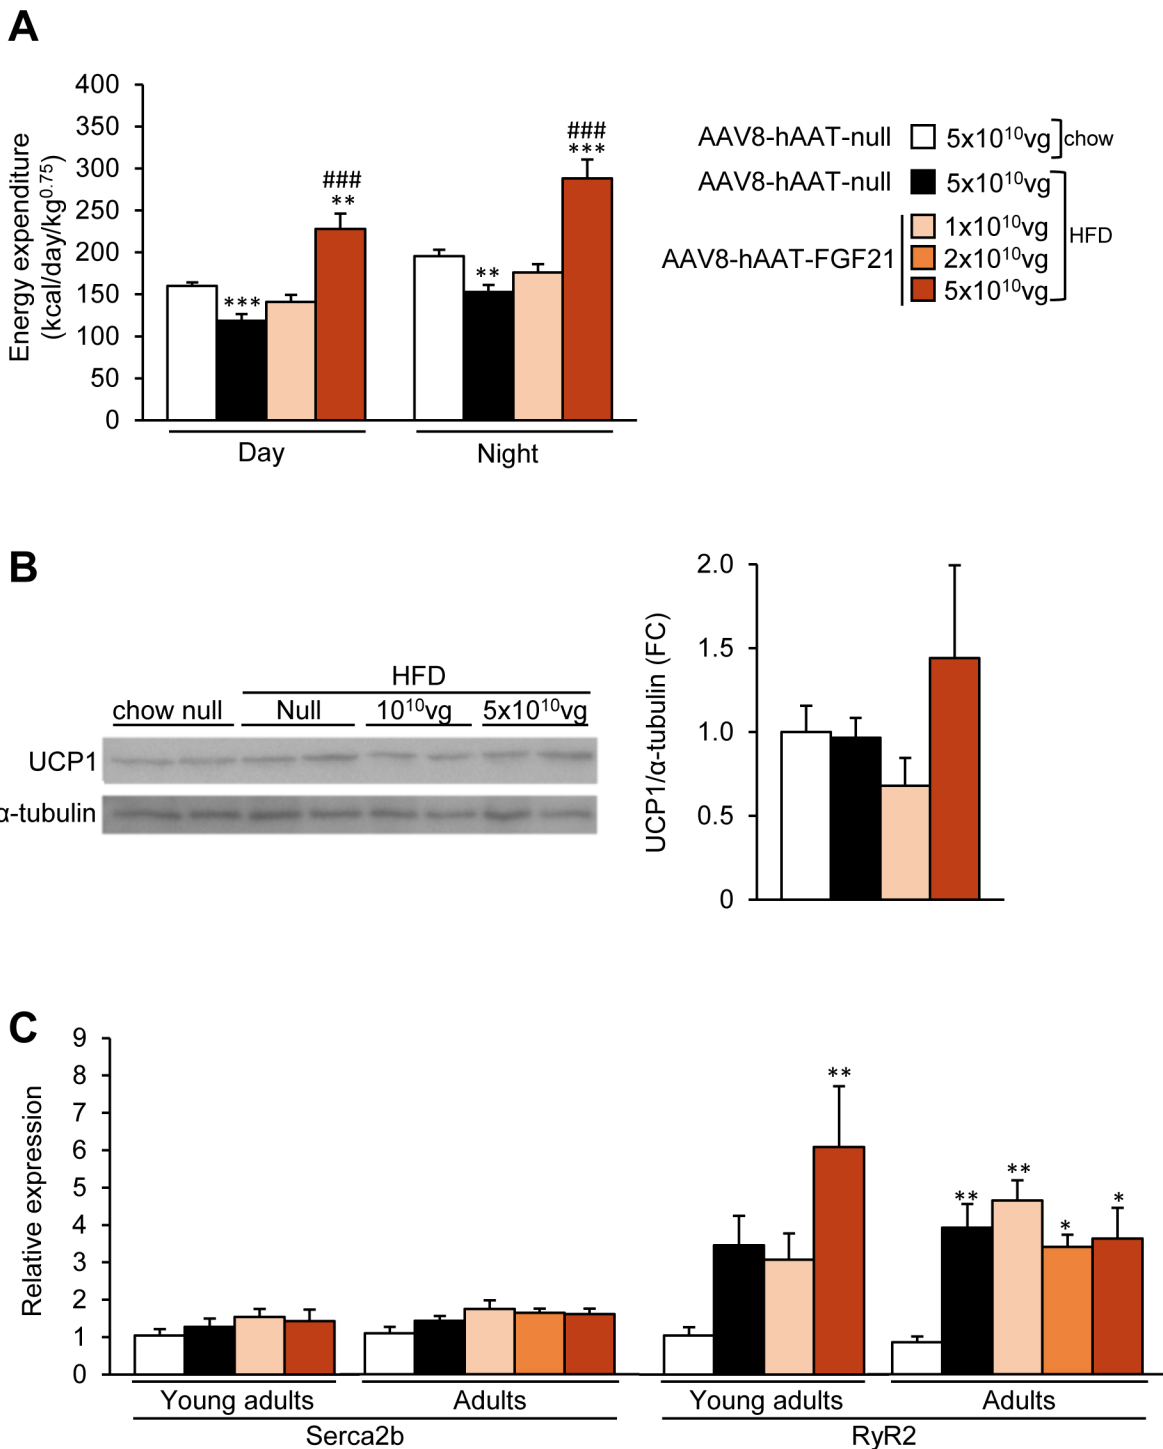

## Appendix Figure S3. Energy expenditure 10 months after gene transfer to the liver.

- A** Energy expenditure was measured 10 months after AAV-hAAT-null or AAV-hAAT-FGF21 vector delivery in the cohort of animals that initiated HFD-feeding at 2 months of age. Data were taken during the light and dark cycles.
- B** Western-blot analysis of UCP1 content in iWAT from the same cohort of animals. A representative immunoblot is shown (left). The graph shows the densitometric analysis of two different immunoblots (right).
- C** Relative expression of Serca2b and RyR2 in the iWAT of the groups of animals that initiated the HFD feeding and received FGF21 vectors as young adults or adults.

Data information: All values are expressed as mean ± SEM. In (A, C) Young adults: AAV8-hAAT-null chow (n=10 animals), AAV8-hAAT-null HFD (n=8), AAV8-hAAT-FGF21 HFD 1x10<sup>10</sup> vg (n=9) and 5x10<sup>10</sup> vg (n=8). Adults: AAV8-hAAT-null chow (n=7), AAV8-hAAT-null HFD (n=7), AAV8-hAAT-FGF21 HFD 1x10<sup>10</sup> vg (n=7), 2x10<sup>10</sup> vg (n=8) and 5x10<sup>10</sup> vg (n=7). In (B) n=4 animals/group. In (A-C) data were analyzed by one-way ANOVA with Tukey's post hoc correction. \*P<0.05, \*\*P<0.01 and \*\*\*P<0.001 versus the chow-fed Null-injected group. ###P<0.001 versus the HFD-fed Null-injected group. HFD, High-fat diet.

## Appendix Figure S4

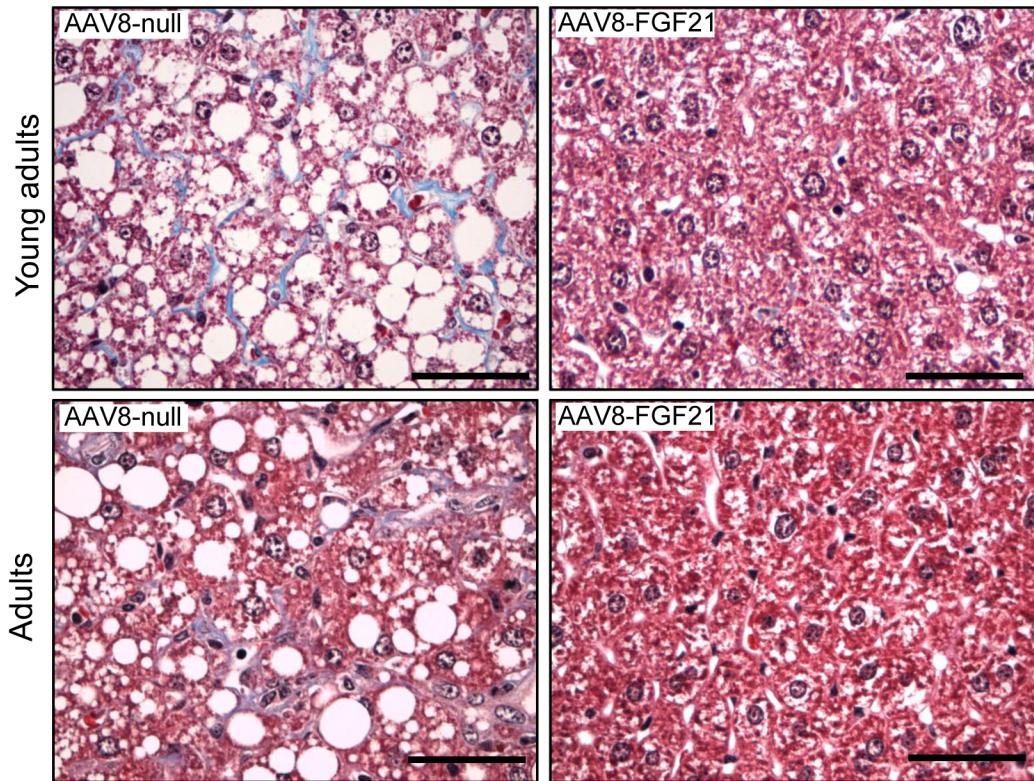

### Appendix Figure S4. AAV8-hAAT-FGF21-mediated amelioration of liver fibrosis.

Analysis of hepatic fibrosis through Masson's trichrome staining in animals fed a HFD that received  $5 \times 10^{10}$  vg/mouse of either AAV8-hAAT-null or AAV8-hAAT-FGF21 vectors. AAV8-hAAT-FGF21 treatment (right panels) markedly decreased the detection of collagen fibers that were readily detectable (in blue) in animals treated with the null vector (left panels). Scale bars: 50  $\mu$ m.

# Appendix Figure S5

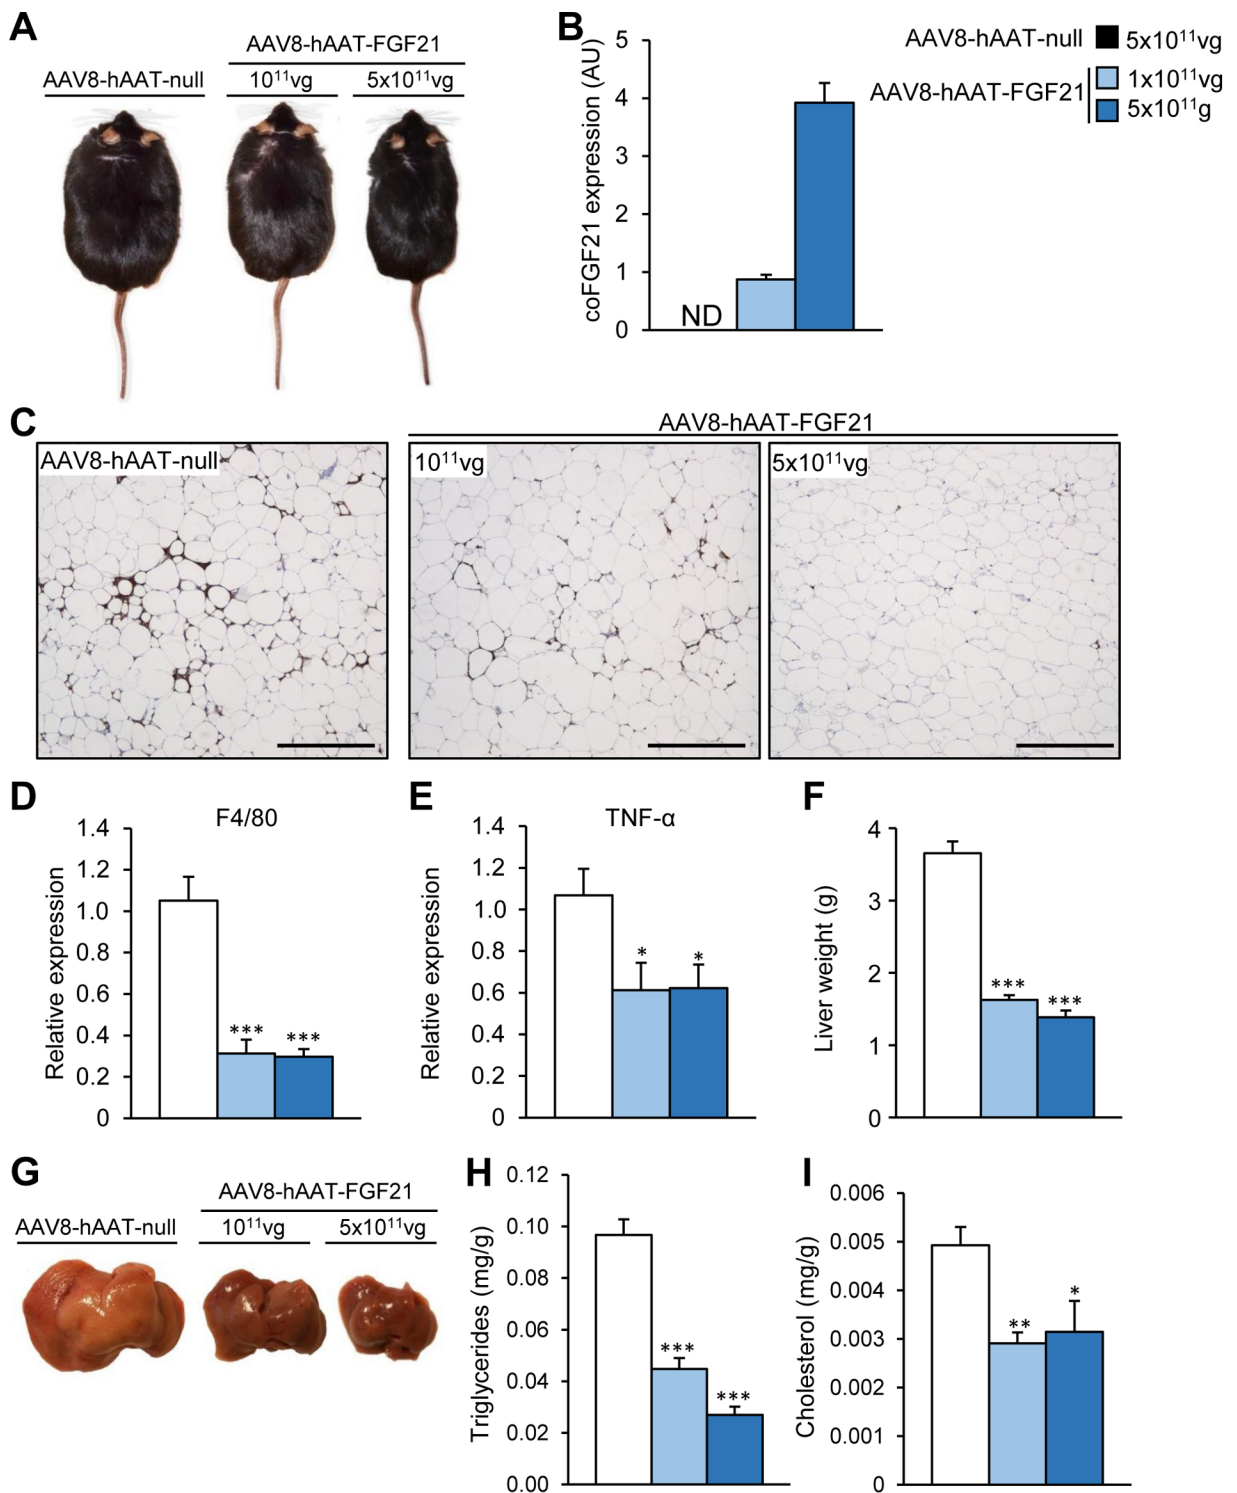

## Appendix Figure S5. Effects of FGF21 liver gene transfer on ob/ob mice.

- A** Representative images of 7-month-old ob/ob animals injected at 2 months of age with either AAV8-hAAT-null vectors or AAV8-hAAT-FGF21 vectors at two different doses (1x10<sup>11</sup> or 5x10<sup>11</sup> vg/mouse).
- B** Hepatic expression of AAV-derived FGF21 in the same cohorts as in (A). The qRT-PCR was performed with primers that specifically detected the codon-optimized FGF21 (coFGF21) encoded by the AAV-born expression cassette.
- C** Immunohistochemistry for the macrophage-specific marker Mac2 in eWAT sections from ob/ob mice that received AAV8-hAAT-FGF21 vectors. Scale bars: 500  $\mu$ m.
- D, E** Quantification by qRT-PCR of the expression of the markers of inflammation F4/80 (D) and TNF- $\alpha$  (E) in the same cohorts of mice.
- F, G** Weight (F) and representative images of the liver (G) obtained from animals belonging to the same experimental groups as in (A).
- H, I** Hepatic triglyceride and cholesterol content in the fed state in the same cohorts as in (A).

Data information: All values are expressed as mean  $\pm$  SEM. In (B, D-F, H, I) AAV8-hAAT-null (n=10 animals), AAV8-hAAT-FGF21 1x10<sup>11</sup> vg (n=10) and 5x10<sup>11</sup> vg (n=9). In (B, D-F, H, I) data were analyzed by one-way ANOVA with Tukey's post hoc correction. \*P<0.05, \*\*P<0.01 and \*\*\*P<0.001 versus null-injected ob/ob group.

## Appendix Figure S6

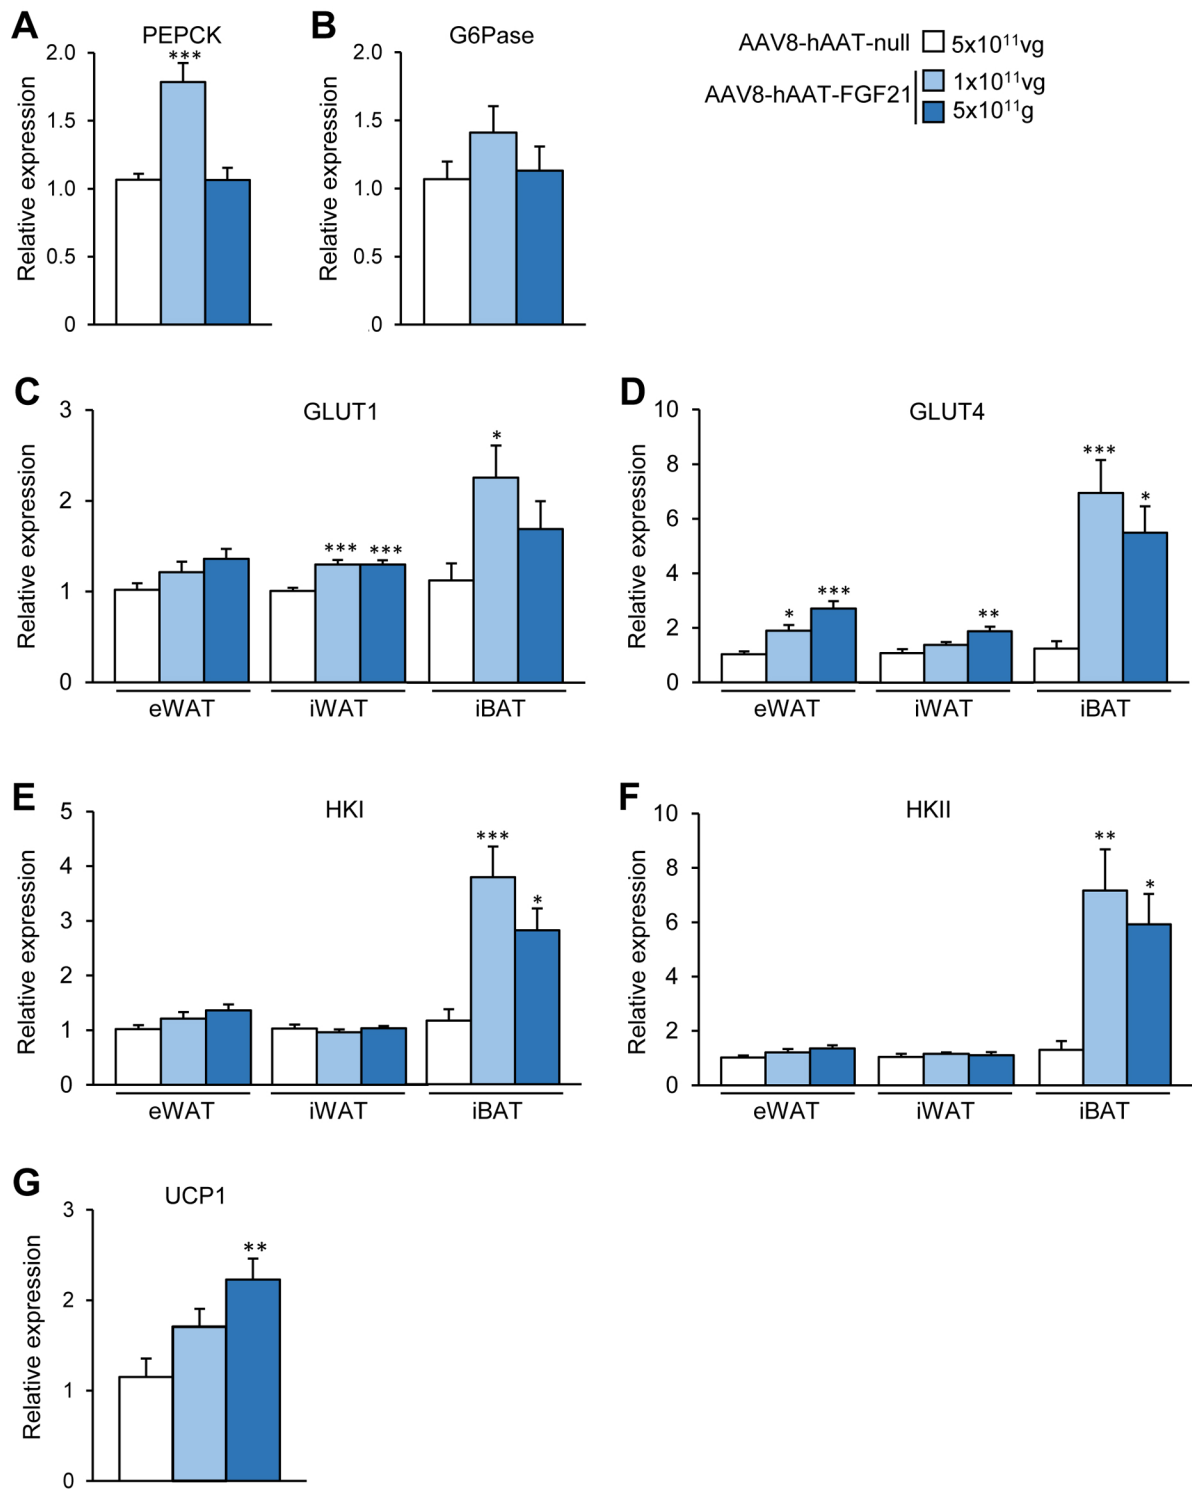

### Appendix Figure S6. AAV8-hAAT-FGF21 treatment increases the expression of genes involved in glucose uptake and thermogenesis in adipose tissue of ob/ob mice.

**A, B** Quantification by qRT-PCR of liver PEPCK (A) and G6Pase (B) expression in ob/ob mice injected at 2 months of age with either AAV8-hAAT-null vectors or AAV8-hAAT-FGF21 vectors.

**C-F** Quantification by qRT-PCR of GLUT1 (C), GLUT4 (D), HKI (E) and HKII (F) expression in eWAT, iWAT and iBAT in the same animals as in (A).

**G** Relative expression of UCP1 in iBAT in the same cohorts as in (A).

Data information: All values are expressed as mean  $\pm$  SEM. In (A-G) AAV8-hAAT-null (n=10 animals), AAV8-hAAT-FGF21 1x10<sup>11</sup> vg (n=10) and 5x10<sup>11</sup> vg (n=9). In (A-G) data were analyzed by one-way ANOVA with Tukey's post hoc correction. \*P<0.05, \*\*P<0.01 and \*\*\*P<0.001 versus null-injected ob/ob group.

# Appendix Figure S7

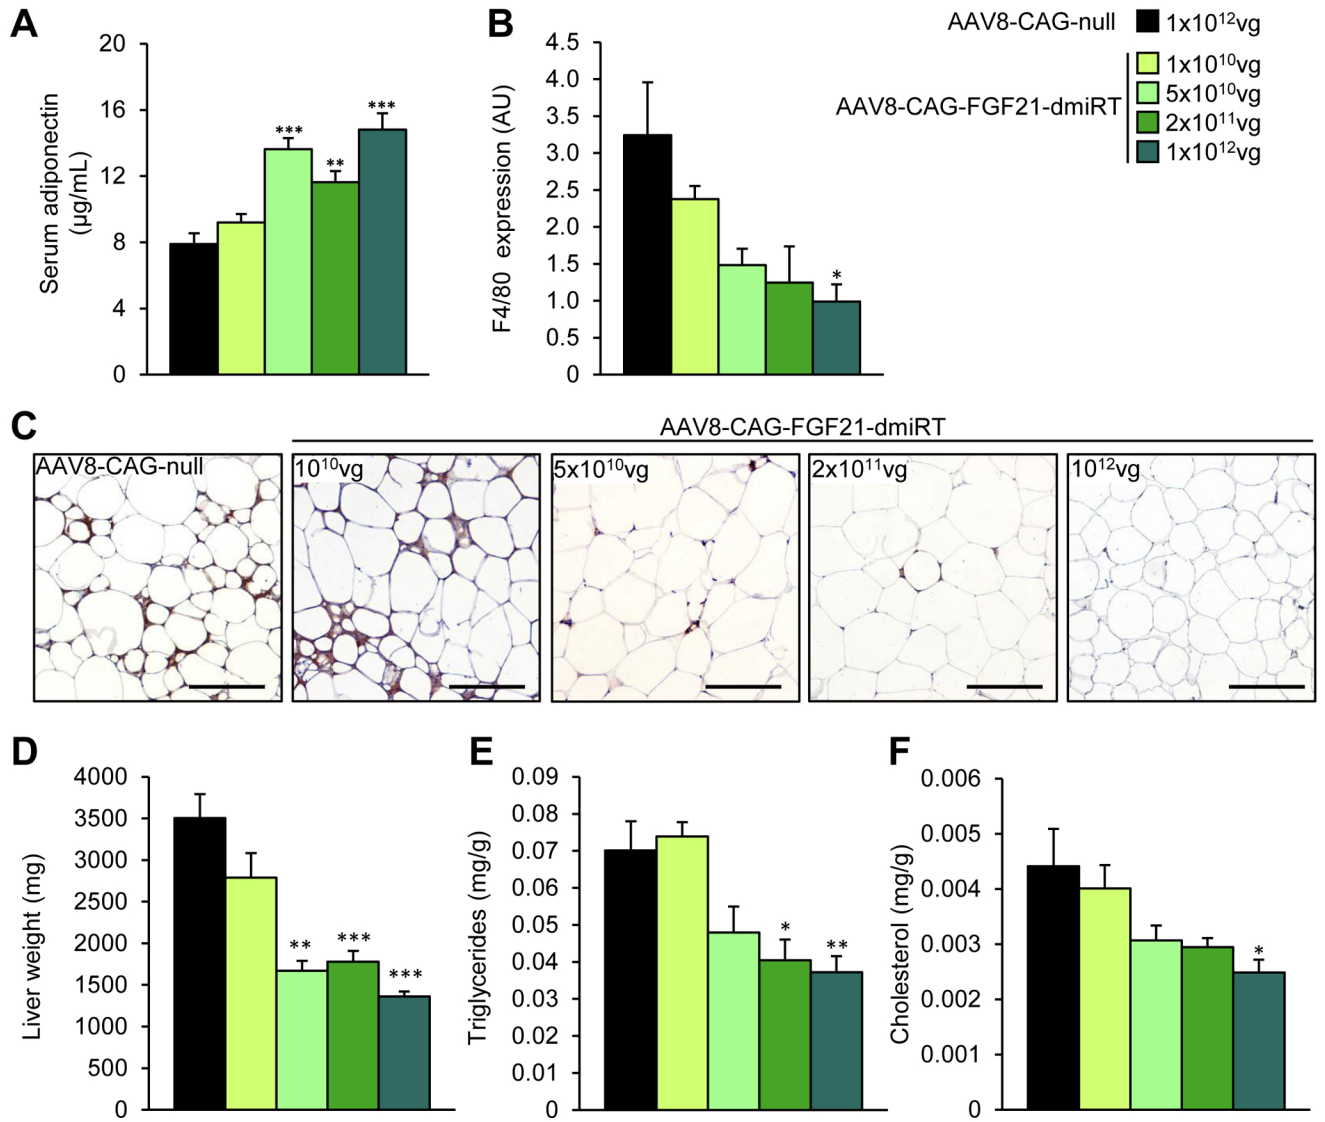

## Appendix Figure S7. Impact of FGF21 gene transfer to the eWAT of ob/ob mice.

- A** Serum adiponectin levels in 25-week-old ob/ob animals injected intra-eWAT at 11 weeks of age with either AAV8-CAG-null vectors or AAV8-CAG-FGF21-dmiRT vectors at 4 different doses (1x10<sup>10</sup>, 5x10<sup>10</sup>, 2x10<sup>11</sup>, 1x10<sup>12</sup> vg/mouse).
- B** Quantification by qRT-PCR of the expression of the macrophage marker F4/80 the same groups of animals as in (A).
- C** Representative images of the immunostaining of eWAT sections from ob/ob mice that received AAV8-CAG-FGF21-dmiRT vectors for the macrophage-specific marker Mac2. Scale bars: 200 µm.
- D** Weight of the liver in all intra-eWAT treatment groups.
- E, F** Hepatic triglyceride (E) and cholesterol (F) content in the fed stated in the same cohorts as in (A).

Data information: All values are expressed as mean ± SEM. In (A, B, D-F) AAV8-hAAT-null (n=7 animals), AAV8-hAAT-FGF21 1x10<sup>10</sup> vg (n=6), 5x10<sup>10</sup> vg (n=4), 2x10<sup>11</sup> vg (n=7) and 1x10<sup>12</sup> vg (n=8). In (A, B, D-F) data were analyzed by one-way ANOVA with Tukey's post hoc correction. \*P<0.05, \*\*P<0.01 and \*\*\*P<0.001 versus null-injected ob/ob group.



**Table S1. Figure 1C significance *P*-values**

| Young adults                              | vs chow AAV8-hAAT-null                    | eWAT    | iWAT    | rWAT    | Liver   | Quadriceps |
|-------------------------------------------|-------------------------------------------|---------|---------|---------|---------|------------|
|                                           | HFD AAV8-hAAT-null                        | <0.0001 | <0.0001 | <0.0001 | <0.0001 | ns         |
| HFD AAV8-hAAT-FGF21 1x10 <sup>10</sup> vg | 0.0010                                    | 0.0007  | 0.0001  | 0.0005  | ns      |            |
| HFD AAV8-hAAT-FGF21 5x10 <sup>10</sup> vg | ns                                        | ns      | ns      | ns      | ns      |            |
| Young adults                              | vs HFD AAV8-hAAT-null                     | eWAT    | iWAT    | rWAT    | Liver   | Quadriceps |
|                                           | HFD AAV8-hAAT-FGF21 1x10 <sup>10</sup> vg | ns      | ns      | ns      | 0.0282  | ns         |
| HFD AAV8-hAAT-FGF21 5x10 <sup>10</sup> vg | 0.0027                                    | 0.0088  | 0.0004  | <0.0001 | ns      |            |
| Adults                                    | vs chow AAV8-hAAT-null                    | eWAT    | iWAT    | rWAT    | Liver   | Quadriceps |
|                                           | HFD AAV8-hAAT-null                        | 0.0068  | 0.0075  | 0.0021  | <0.0001 | ns         |
|                                           | HFD AAV8-hAAT-FGF21 1x10 <sup>10</sup> vg | 0.0348  | 0.0039  | 0.0500  | 0.0288  | ns         |
|                                           | HFD AAV8-hAAT-FGF21 2x10 <sup>10</sup> vg | ns      | ns      | ns      | ns      | ns         |
|                                           | HFD AAV8-hAAT-FGF21 5x10 <sup>10</sup> vg | ns      | ns      | ns      | ns      | ns         |
|                                           | vs HFD AAV8-hAAT-null                     | eWAT    | iWAT    | rWAT    | Liver   | Quadriceps |
|                                           | HFD AAV8-hAAT-FGF21 1x10 <sup>10</sup> vg | ns      | ns      | ns      | ns      | ns         |
|                                           | HFD AAV8-hAAT-FGF21 2x10 <sup>10</sup> vg | ns      | ns      | ns      | 0.0024  | ns         |
|                                           | HFD AAV8-hAAT-FGF21 5x10 <sup>10</sup> vg | 0.0028  | 0.0036  | 0.0018  | <0.0001 | ns         |

ns, non-significant

**Table S2. Figure 1D significance *P*-values**

| Young adults                              | vs chow AAV8-hAAT-null                    | 6 months | 12 months |
|-------------------------------------------|-------------------------------------------|----------|-----------|
|                                           | HFD AAV8-hAAT-null                        | <0.0001  | 0.0034    |
|                                           | HFD AAV8-hAAT-FGF21 1x10 <sup>10</sup> vg | <0.0001  | 0.0018    |
|                                           | HFD AAV8-hAAT-FGF21 5x10 <sup>10</sup> vg | <0.0001  | <0.0001   |
|                                           | vs HFD AAV8-hAAT-null                     | 6 months | 12 months |
| HFD AAV8-hAAT-FGF21 1x10 <sup>10</sup> vg | 0.0013                                    | ns       |           |
| HFD AAV8-hAAT-FGF21 5x10 <sup>10</sup> vg | <0.0001                                   | <0.0001  |           |
| Adults                                    | vs chow AAV8-hAAT-null                    | 3 months | 8 months  |
|                                           | HFD AAV8-hAAT-null                        | 0.0002   | ns        |
|                                           | HFD AAV8-hAAT-FGF21 1x10 <sup>10</sup> vg | <0.0001  | <0.0001   |
|                                           | HFD AAV8-hAAT-FGF21 2x10 <sup>10</sup> vg | <0.0001  | 0.0004    |
|                                           | HFD AAV8-hAAT-FGF21 5x10 <sup>10</sup> vg | <0.0001  | <0.0001   |
|                                           | vs HFD AAV8-hAAT-null                     | 3 months | 8 months  |
|                                           | HFD AAV8-hAAT-FGF21 1x10 <sup>10</sup> vg | 0.0002   | 0.0003    |
|                                           | HFD AAV8-hAAT-FGF21 2x10 <sup>10</sup> vg | <0.0001  | 0.0009    |
| HFD AAV8-hAAT-FGF21 5x10 <sup>10</sup> vg | <0.0001                                   | <0.0001  |           |

ns, non-significant

**Table S3. Figure 2 significance P-values**

|                     |                                           |          |          |          |          |          |          |
|---------------------|-------------------------------------------|----------|----------|----------|----------|----------|----------|
| <b>Young adults</b> | <b>vs chow AAV8-hAAT-null</b>             | <b>B</b> | <b>C</b> | <b>D</b> |          |          |          |
|                     | HFD AAV8-hAAT-null                        | 0.0319   | 0.0134   | <0.0001  |          |          |          |
|                     | HFD AAV8-hAAT-FGF21 1x10 <sup>10</sup> vg | ns       | ns       | 0.0002   |          |          |          |
|                     | HFD AAV8-hAAT-FGF21 5x10 <sup>10</sup> vg | ns       | ns       | ns       |          |          |          |
|                     | <b>vs HFD AAV8-hAAT-null</b>              | <b>B</b> | <b>C</b> | <b>D</b> |          |          |          |
|                     | HFD AAV8-hAAT-FGF21 1x10 <sup>10</sup> vg | ns       | ns       | ns       |          |          |          |
|                     | HFD AAV8-hAAT-FGF21 5x10 <sup>10</sup> vg | ns       | 0.0236   | 0.0007   |          |          |          |
| <b>Adults</b>       | <b>vs chow AAV8-hAAT-null</b>             | <b>B</b> | <b>C</b> | <b>D</b> | <b>F</b> | <b>G</b> | <b>H</b> |
|                     | HFD AAV8-hAAT-null                        | ns       | 0.0012   | 0.0003   | 0.0140   | ns       | 0.0390   |
|                     | HFD AAV8-hAAT-FGF21 1x10 <sup>10</sup> vg | ns       | ns       | ns       | ns       | ns       | ns       |
|                     | HFD AAV8-hAAT-FGF21 2x10 <sup>10</sup> vg | ns       | ns       | ns       | ns       | ns       | ns       |
|                     | HFD AAV8-hAAT-FGF21 5x10 <sup>10</sup> vg | 0.0220   | ns       | ns       | ns       | ns       | ns       |
|                     | <b>vs HFD AAV8-hAAT-null</b>              | <b>B</b> | <b>C</b> | <b>D</b> | <b>F</b> | <b>G</b> | <b>H</b> |
|                     | HFD AAV8-hAAT-FGF21 1x10 <sup>10</sup> vg | ns       | 0.0073   | ns       | ns       | ns       | ns       |
|                     | HFD AAV8-hAAT-FGF21 2x10 <sup>10</sup> vg | ns       | 0.0012   | 0.0303   | ns       | ns       | ns       |
|                     | HFD AAV8-hAAT-FGF21 5x10 <sup>10</sup> vg | 0.0173   | 0.0013   | 0.0157   | 0.0100   | 0.0320   | ns       |

ns, non-significant

**Table S4. Figure 3A significance *P*-values**

|                                           |                                           |                    |
|-------------------------------------------|-------------------------------------------|--------------------|
| <b>Young adults</b>                       | <b>vs chow AAV8-hAAT-null</b>             | <b>Food intake</b> |
|                                           | HFD AAV8-hAAT-null                        | ns                 |
|                                           | HFD AAV8-hAAT-FGF21 1x10 <sup>10</sup> vg | 0.0033             |
|                                           | HFD AAV8-hAAT-FGF21 5x10 <sup>10</sup> vg | 0.0495             |
|                                           | <b>vs HFD AAV8-hAAT-null</b>              | <b>Food intake</b> |
|                                           | HFD AAV8-hAAT-FGF21 1x10 <sup>10</sup> vg | ns                 |
| HFD AAV8-hAAT-FGF21 5x10 <sup>10</sup> vg | ns                                        |                    |
| <b>Adults</b>                             | <b>vs chow AAV8-hAAT-null</b>             | <b>Food intake</b> |
|                                           | HFD AAV8-hAAT-null                        | ns                 |
|                                           | HFD AAV8-hAAT-FGF21 1x10 <sup>10</sup> vg | <0.0001            |
|                                           | HFD AAV8-hAAT-FGF21 2x10 <sup>10</sup> vg | 0.0004             |
|                                           | HFD AAV8-hAAT-FGF21 5x10 <sup>10</sup> vg | <0.0001            |
|                                           | <b>vs HFD AAV8-hAAT-null</b>              | <b>Food intake</b> |
|                                           | HFD AAV8-hAAT-FGF21 1x10 <sup>10</sup> vg | <0.0001            |
|                                           | HFD AAV8-hAAT-FGF21 2x10 <sup>10</sup> vg | 0.0009             |
|                                           | HFD AAV8-hAAT-FGF21 5x10 <sup>10</sup> vg | <0.0001            |

ns, non-significant

**Table S5. Figure 3B significance *P*-values**

|                                           |                                           |            |              |
|-------------------------------------------|-------------------------------------------|------------|--------------|
| <b>Young adults</b>                       | <b>vs chow AAV8-hAAT-null</b>             | <b>Day</b> | <b>Night</b> |
|                                           | HFD AAV8-hAAT-null                        | <0.0001    | <0.0001      |
|                                           | HFD AAV8-hAAT-FGF21 1x10 <sup>10</sup> vg | ns         | ns           |
|                                           | HFD AAV8-hAAT-FGF21 5x10 <sup>10</sup> vg | <0.0001    | <0.0001      |
|                                           | <b>vs HFD AAV8-hAAT-null</b>              | <b>Day</b> | <b>Night</b> |
|                                           | HFD AAV8-hAAT-FGF21 1x10 <sup>10</sup> vg | 0.0341     | 0.0220       |
| HFD AAV8-hAAT-FGF21 5x10 <sup>10</sup> vg | <0.0001                                   | <0.0001    |              |
| <b>Adults</b>                             | <b>vs chow AAV8-hAAT-null</b>             | <b>Day</b> | <b>Night</b> |
|                                           | HFD AAV8-hAAT-null                        | ns         | 0.0475       |
|                                           | HFD AAV8-hAAT-FGF21 1x10 <sup>10</sup> vg | ns         | ns           |
|                                           | HFD AAV8-hAAT-FGF21 2x10 <sup>10</sup> vg | ns         | ns           |
|                                           | HFD AAV8-hAAT-FGF21 5x10 <sup>10</sup> vg | <0.0001    | <0.0001      |
|                                           | <b>vs HFD AAV8-hAAT-null</b>              | <b>Day</b> | <b>Night</b> |
|                                           | HFD AAV8-hAAT-FGF21 1x10 <sup>10</sup> vg | ns         | ns           |
|                                           | HFD AAV8-hAAT-FGF21 2x10 <sup>10</sup> vg | 0.0490     | 0.0807       |
| HFD AAV8-hAAT-FGF21 5x10 <sup>10</sup> vg | <0.0001                                   | <0.0001    |              |

ns, non-significant

**Table S6. Figure 3C significance *P*-values**

| Young adults                              | <b>vs chow AAV8-hAAT-null</b>             | <b>Distance</b> | <b>Resting</b> | <b>Slow time</b> | <b>Fast time</b> |
|-------------------------------------------|-------------------------------------------|-----------------|----------------|------------------|------------------|
|                                           | HFD AAV8-hAAT-null                        | 0.0240          | 0.0449         | 0.0397           | 0.0298           |
|                                           | HFD AAV8-hAAT-FGF21 1x10 <sup>10</sup> vg | ns              | ns             | ns               | ns               |
|                                           | HFD AAV8-hAAT-FGF21 5x10 <sup>10</sup> vg | ns              | ns             | ns               | ns               |
|                                           | <b>vs HFD AAV8-hAAT-null</b>              | <b>Distance</b> | <b>Resting</b> | <b>Slow time</b> | <b>Fast time</b> |
|                                           | HFD AAV8-hAAT-FGF21 1x10 <sup>10</sup> vg | ns              | ns             | ns               | ns               |
| HFD AAV8-hAAT-FGF21 5x10 <sup>10</sup> vg | 0.0492                                    | 0.0360          | 0.0402         | 0.0132           |                  |

ns, non-significant

**Table S7. Figure 3E significance *P*-values**

| Young adults                              | <b>vs chow AAV8-hAAT-null</b>             | <b>UCP1</b> |
|-------------------------------------------|-------------------------------------------|-------------|
|                                           | HFD AAV8-hAAT-null                        | 0.0110      |
|                                           | HFD AAV8-hAAT-FGF21 1x10 <sup>10</sup> vg | 0.0140      |
|                                           | HFD AAV8-hAAT-FGF21 5x10 <sup>10</sup> vg | 0.0030      |
|                                           | <b>vs HFD AAV8-hAAT-null</b>              | <b>UCP1</b> |
|                                           | HFD AAV8-hAAT-FGF21 1x10 <sup>10</sup> vg | ns          |
| HFD AAV8-hAAT-FGF21 5x10 <sup>10</sup> vg | 0.0440                                    |             |

ns, non-significant

**Table S8. Figure 3G significance *P*-values**

| Young adults                              | <b>vs chow AAV8-hAAT-null</b>             | <b>Phospho1</b> |
|-------------------------------------------|-------------------------------------------|-----------------|
|                                           | HFD AAV8-hAAT-null                        | ns              |
|                                           | HFD AAV8-hAAT-FGF21 1x10 <sup>10</sup> vg | ns              |
|                                           | HFD AAV8-hAAT-FGF21 5x10 <sup>10</sup> vg | 0.0040          |
|                                           | <b>vs HFD AAV8-hAAT-null</b>              | <b>Phospho1</b> |
|                                           | HFD AAV8-hAAT-FGF21 1x10 <sup>10</sup> vg | ns              |
| HFD AAV8-hAAT-FGF21 5x10 <sup>10</sup> vg | 0.0010                                    |                 |
| Adults                                    | <b>vs chow AAV8-hAAT-null</b>             | <b>Phospho1</b> |
|                                           | HFD AAV8-hAAT-null                        | ns              |
|                                           | HFD AAV8-hAAT-FGF21 1x10 <sup>10</sup> vg | ns              |
|                                           | HFD AAV8-hAAT-FGF21 2x10 <sup>10</sup> vg | ns              |
|                                           | HFD AAV8-hAAT-FGF21 5x10 <sup>10</sup> vg | <0.0001         |
|                                           | <b>vs HFD AAV8-hAAT-null</b>              | <b>Phospho1</b> |
| HFD AAV8-hAAT-FGF21 1x10 <sup>10</sup> vg | ns                                        |                 |
| HFD AAV8-hAAT-FGF21 2x10 <sup>10</sup> vg | ns                                        |                 |
| HFD AAV8-hAAT-FGF21 5x10 <sup>10</sup> vg | 0.0150                                    |                 |

ns, non-significant

**Table S9. Figure 4 significance *P* -values**

|                     |                                           |           |                    |                 |
|---------------------|-------------------------------------------|-----------|--------------------|-----------------|
| <b>Young adults</b> | <b>vs chow AAV8-hAAT-null</b>             | <b>TG</b> | <b>Cholesterol</b> | <b>Collagen</b> |
|                     | HFD AAV8-hAAT-null                        | <0.0001   | <0.0001            | <0.0001         |
|                     | HFD AAV8-hAAT-FGF21 5x10 <sup>10</sup> vg | 0.0098    | 0.0014             | 0.0120          |
| <b>Young adults</b> | <b>vs HFD AAV8-hAAT-null</b>              | <b>TG</b> | <b>Cholesterol</b> | <b>Collagen</b> |
|                     | HFD AAV8-hAAT-FGF21 5x10 <sup>10</sup> vg | 0.0336    | 0.0212             | 0.0350          |
| <b>Adults</b>       | <b>vs chow AAV8-hAAT-null</b>             | <b>TG</b> | <b>Cholesterol</b> | <b>Collagen</b> |
|                     | HFD AAV8-hAAT-null                        | 0.0007    | <0.0001            | 0.0070          |
|                     | HFD AAV8-hAAT-FGF21 5x10 <sup>10</sup> vg | ns        | 0.0200             | ns              |
|                     | <b>vs HFD AAV8-hAAT-null</b>              | <b>TG</b> | <b>Cholesterol</b> | <b>Collagen</b> |
|                     | HFD AAV8-hAAT-FGF21 5x10 <sup>10</sup> vg | 0.0031    | 0.0475             | 0.02            |

ns, non-significant

**Table S10. Figure 5B significance *P* -values**

|                     |                                           |               |            |
|---------------------|-------------------------------------------|---------------|------------|
| <b>Young adults</b> | <b>vs chow AAV8-hAAT-null</b>             | <b>Fasted</b> | <b>Fed</b> |
|                     | HFD AAV8-hAAT-null                        | 0.0172        | 0.0076     |
|                     | HFD AAV8-hAAT-FGF21 1x10 <sup>10</sup> vg | ns            | ns         |
|                     | HFD AAV8-hAAT-FGF21 5x10 <sup>10</sup> vg | ns            | ns         |
|                     | <b>vs HFD AAV8-hAAT-null</b>              | <b>Fasted</b> | <b>Fed</b> |
|                     | HFD AAV8-hAAT-FGF21 1x10 <sup>10</sup> vg | ns            | ns         |
|                     | HFD AAV8-hAAT-FGF21 5x10 <sup>10</sup> vg | 0.0010        | 0.0025     |
| <b>Adults</b>       | <b>vs chow AAV8-hAAT-null</b>             | <b>Fasted</b> | <b>Fed</b> |
|                     | HFD AAV8-hAAT-null                        | <0.0001       | 0.00371564 |
|                     | HFD AAV8-hAAT-FGF21 1x10 <sup>10</sup> vg | 0.0001        | 0.0076     |
|                     | HFD AAV8-hAAT-FGF21 2x10 <sup>10</sup> vg | ns            | ns         |
|                     | HFD AAV8-hAAT-FGF21 5x10 <sup>10</sup> vg | 0.0213        | ns         |
|                     | <b>vs HFD AAV8-hAAT-null</b>              | <b>Fasted</b> | <b>Fed</b> |
|                     | HFD AAV8-hAAT-FGF21 1x10 <sup>10</sup> vg | 0.0498        | ns         |
|                     | HFD AAV8-hAAT-FGF21 2x10 <sup>10</sup> vg | 0.0038        | 0.0070     |
|                     | HFD AAV8-hAAT-FGF21 5x10 <sup>10</sup> vg | 0.0019        | 0.0077     |

ns, non-significant

**Table S11. Figure 5C significance *P* -values**

|                                           |                                           |                    |
|-------------------------------------------|-------------------------------------------|--------------------|
| <b>Young adults</b>                       | <b>vs chow AAV8-hAAT-null</b>             | <b>β-cell mass</b> |
|                                           | HFD AAV8-hAAT-null                        | 0.1200             |
|                                           | HFD AAV8-hAAT-FGF21 1x10 <sup>10</sup> vg | ns                 |
|                                           | HFD AAV8-hAAT-FGF21 5x10 <sup>10</sup> vg | ns                 |
|                                           | <b>vs HFD AAV8-hAAT-null</b>              | <b>β-cell mass</b> |
|                                           | HFD AAV8-hAAT-FGF21 1x10 <sup>10</sup> vg | 0.0281             |
| HFD AAV8-hAAT-FGF21 5x10 <sup>10</sup> vg | 0.0212                                    |                    |

ns, non-significant

**Table S12. Figure 5D, E significance *P* -values**

|                                           |                                           |           |           |           |           |           |           |
|-------------------------------------------|-------------------------------------------|-----------|-----------|-----------|-----------|-----------|-----------|
| <b>Young adults</b>                       | <b>vs chow AAV8-hAAT-null</b>             | <b>15</b> | <b>30</b> | <b>45</b> | <b>60</b> | <b>75</b> | <b>90</b> |
|                                           | HFD AAV8-hAAT-null                        | 0.0009    | 0.0002    | <0.0001   | <0.0001   | <0.0001   | 0.0006    |
|                                           | HFD AAV8-hAAT-FGF21 1x10 <sup>10</sup> vg | 0.0199    | ns        | ns        | ns        | ns        | ns        |
|                                           | HFD AAV8-hAAT-FGF21 5x10 <sup>10</sup> vg | ns        | 0.0100    | 0.0004    | 0.0004    | 0.0002    | 0.0100    |
|                                           | <b>vs HFD AAV8-hAAT-null</b>              | <b>15</b> | <b>30</b> | <b>45</b> | <b>60</b> | <b>75</b> | <b>90</b> |
|                                           | HFD AAV8-hAAT-FGF21 1x10 <sup>10</sup> vg | ns        | 0.0100    | 0.0055    | 0.0048    | 0.0025    | 0.0057    |
| HFD AAV8-hAAT-FGF21 5x10 <sup>10</sup> vg | 0.0004                                    | <0.0001   | <0.0001   | <0.0001   | <0.0001   | <0.0001   |           |
| <b>Adults</b>                             | <b>vs chow AAV8-hAAT-null</b>             | <b>15</b> | <b>30</b> | <b>45</b> | <b>60</b> | <b>75</b> | <b>90</b> |
|                                           | HFD AAV8-hAAT-null                        | 0.0001    | <0.0001   | <0.0001   | 0.0230    | ns        | ns        |
|                                           | HFD AAV8-hAAT-FGF21 1x10 <sup>10</sup> vg | ns        | ns        | ns        | ns        | ns        | ns        |
|                                           | HFD AAV8-hAAT-FGF21 2x10 <sup>10</sup> vg | ns        | ns        | ns        | ns        | ns        | ns        |
|                                           | HFD AAV8-hAAT-FGF21 5x10 <sup>10</sup> vg | ns        | 0.0020    | 0.0010    | 0.0070    | 0.0300    |           |
|                                           | <b>vs HFD AAV8-hAAT-null</b>              | <b>15</b> | <b>30</b> | <b>45</b> | <b>60</b> | <b>75</b> | <b>90</b> |
|                                           | HFD AAV8-hAAT-FGF21 1x10 <sup>10</sup> vg | 0.0004    | 0.0040    | 0.0100    | 0.0090    | ns        | ns        |
|                                           | HFD AAV8-hAAT-FGF21 2x10 <sup>10</sup> vg | <0.0001   | <0.0001   | <0.0001   | 0.0005    | 0.0330    | ns        |
| HFD AAV8-hAAT-FGF21 5x10 <sup>10</sup> vg | <0.0001                                   | <0.0001   | <0.0001   | <0.0001   | <0.0001   | 0.0010    |           |

ns, non-significant

**Table S13. Figure 5F significance *P* -values**

|                                           |                                           |           |           |           |           |
|-------------------------------------------|-------------------------------------------|-----------|-----------|-----------|-----------|
| <b>Young adults</b>                       | <b>vs chow AAV8-hAAT-null</b>             | <b>15</b> | <b>30</b> | <b>60</b> | <b>90</b> |
|                                           | HFD AAV8-hAAT-null                        | 0.0095    | ns        | 0.0014    | 0.0012    |
|                                           | HFD AAV8-hAAT-FGF21 1x10 <sup>10</sup> vg | ns        | ns        | 0.0153    | ns        |
|                                           | HFD AAV8-hAAT-FGF21 5x10 <sup>10</sup> vg | ns        | 0.0004    | ns        | ns        |
|                                           | <b>vs HFD AAV8-hAAT-null</b>              | <b>15</b> | <b>30</b> | <b>60</b> | <b>90</b> |
|                                           | HFD AAV8-hAAT-FGF21 1x10 <sup>10</sup> vg | ns        | ns        | ns        | ns        |
| HFD AAV8-hAAT-FGF21 5x10 <sup>10</sup> vg | 0.0125                                    | <0.0001   | 0.0002    | 0.001     |           |

ns, non-significant

**Table S14. Figure 5G significance *P* -values**

|                                           |                                           |          |           |           |           |
|-------------------------------------------|-------------------------------------------|----------|-----------|-----------|-----------|
| <b>Young adults</b>                       | <b>vs chow AAV8-hAAT-null</b>             | <b>0</b> | <b>15</b> | <b>30</b> | <b>90</b> |
|                                           | HFD AAV8-hAAT-null                        | 0.0269   | 0.0009    | 0.0065    | 0.0070    |
|                                           | HFD AAV8-hAAT-FGF21 1x10 <sup>10</sup> vg | 0.0016   | 0.0012    | 0.0010    | 0.0035    |
|                                           | HFD AAV8-hAAT-FGF21 5x10 <sup>10</sup> vg | ns       | ns        | ns        | ns        |
|                                           | <b>vs HFD AAV8-hAAT-null</b>              | <b>0</b> | <b>15</b> | <b>30</b> | <b>90</b> |
|                                           | HFD AAV8-hAAT-FGF21 1x10 <sup>10</sup> vg | ns       | ns        | ns        | ns        |
| HFD AAV8-hAAT-FGF21 5x10 <sup>10</sup> vg | 0.0104                                    | 0.0034   | 0.0188    | 0.0006    |           |

ns, non-significant

**Table S15. Figure 6C significance *P* -values**

| vs AAV8-hAAT-null                     | 2 months | 5 months |
|---------------------------------------|----------|----------|
| AAV8-hAAT-FGF21 1x10 <sup>11</sup> vg | 0.0004   | <0.0001  |
| AAV8-hAAT-FGF21 5x10 <sup>11</sup> vg | <0.0001  | <0.0001  |

**Table S16. Figure 6E, G, H significance *P* -values**

| vs AAV8-hAAT-null                     | Adiponectin | Glucose | Insulin |
|---------------------------------------|-------------|---------|---------|
| AAV8-hAAT-FGF21 1x10 <sup>11</sup> vg | 0.0459      | 0.0045  | <0.0001 |
| AAV8-hAAT-FGF21 5x10 <sup>11</sup> vg | 0.0326      | 0.0009  | <0.0001 |

**Table S17. Figure 6I significance *P* -values**

| vs AAV8-hAAT-null                     | 15     | 30      | 45      | 60     | 75     | 90     |
|---------------------------------------|--------|---------|---------|--------|--------|--------|
| AAV8-hAAT-FGF21 1x10 <sup>11</sup> vg | 0.0197 | 0.0004  | ns      | ns     | ns     | ns     |
| AAV8-hAAT-FGF21 5x10 <sup>11</sup> vg | 0.0082 | <0.0001 | <0.0001 | 0.0004 | 0.0010 | 0.0163 |

ns, non-significant

**Table S18. Figure 7C, G, H significance *P* -values**

| vs AAV8-CAG-null                           | FGF21   | Glucose | Insulin |
|--------------------------------------------|---------|---------|---------|
| AAV8-CAG-FGF21-dmiRT 1x10 <sup>10</sup> vg | ns      | ns      | 0.0035  |
| AAV8-CAG-FGF21-dmiRT 5x10 <sup>10</sup> vg | <0.0001 | 0.0480  | <0.0001 |
| AAV8-CAG-FGF21-dmiRT 2x10 <sup>11</sup> vg | <0.0001 | 0.0500  | <0.0001 |
| AAV8-CAG-FGF21-dmiRT 1x10 <sup>12</sup> vg | <0.0001 | 0.0270  | <0.0001 |

ns, non-significant

**Table S19. Figure 7I significance *P* -values**

| vs AAV8-CAG-null                           | 15 | 30     | 45     | 60     | 75     | 90 |
|--------------------------------------------|----|--------|--------|--------|--------|----|
| AAV8-CAG-FGF21-dmiRT 1x10 <sup>10</sup> vg | ns | ns     | ns     | ns     | ns     | ns |
| AAV8-CAG-FGF21-dmiRT 5x10 <sup>10</sup> vg | ns | 0.0094 | 0.0021 | ns     | ns     | ns |
| AAV8-CAG-FGF21-dmiRT 2x10 <sup>11</sup> vg | ns | 0.0024 | 0.0011 | 0.0184 | ns     | ns |
| AAV8-CAG-FGF21-dmiRT 1x10 <sup>12</sup> vg | ns | 0.0004 | 0.0003 | 0.0009 | 0.0037 | ns |

ns, non-significant

**Table S20. Figure 8A significance *P*-values**

| vs AAV1-CMV-null                     | FGF21  |
|--------------------------------------|--------|
| AAV1-CMV-FGF21 3x10 <sup>11</sup> vg | 0.0081 |

**Table S21. Figure 8D significance *P*-values**

| vs AAV1-CMV-null                     | Tibialis | eWAT    | iWAT    | rWAT    | iBAT   | Liver   |
|--------------------------------------|----------|---------|---------|---------|--------|---------|
| AAV1-CMV-FGF21 3x10 <sup>11</sup> vg | 0.0320   | <0.0001 | <0.0001 | <0.0001 | 0.0225 | 0.00192 |

**Table S22. Figure 8E, G significance *P*-values**

| vs AAV1-CMV-null                     | TG     | Insulin |
|--------------------------------------|--------|---------|
| AAV1-CMV-FGF21 3x10 <sup>11</sup> vg | 0.0054 | 0.0115  |

**Table S23. Figure 8H significance *P*-values**

| vs AAV1-CMV-null                     | 15     | 30     | 45     | 60     | 75     | 90     |
|--------------------------------------|--------|--------|--------|--------|--------|--------|
| AAV1-CMV-FGF21 3x10 <sup>11</sup> vg | 0.0020 | 0.0410 | 0.0010 | 0.0050 | 0.0040 | 0.0080 |



**Table S24. Expanded View 2A**

|                                           |                                           |                 |
|-------------------------------------------|-------------------------------------------|-----------------|
| <b>Young adults</b>                       | <b>vs chow AAV8-hAAT-null</b>             | <b>Glucagon</b> |
|                                           | HFD AAV8-hAAT-null                        | ns              |
|                                           | HFD AAV8-hAAT-FGF21 1x10 <sup>10</sup> vg | ns              |
|                                           | HFD AAV8-hAAT-FGF21 5x10 <sup>10</sup> vg | ns              |
|                                           | <b>vs HFD AAV8-hAAT-null</b>              | <b>Glucagon</b> |
|                                           | HFD AAV8-hAAT-FGF21 1x10 <sup>10</sup> vg | 0.0060          |
| HFD AAV8-hAAT-FGF21 5x10 <sup>10</sup> vg | 0.0014                                    |                 |

ns, non-significant

**Table S25. Expanded View 3P**

|                                           |                                           |               |
|-------------------------------------------|-------------------------------------------|---------------|
| <b>Young adults</b>                       | <b>vs chow AAV8-hAAT-null</b>             | <b>IGFBP1</b> |
|                                           | HFD AAV8-hAAT-null                        | 0.0044        |
|                                           | HFD AAV8-hAAT-FGF21 5x10 <sup>10</sup> vg | ns            |
|                                           | <b>vs HFD AAV8-hAAT-null</b>              | <b>IGFBP1</b> |
| HFD AAV8-hAAT-FGF21 5x10 <sup>10</sup> vg | ns                                        |               |
| <b>Adults</b>                             | <b>vs chow AAV8-hAAT-null</b>             | <b>IGFBP1</b> |
|                                           | HFD AAV8-hAAT-null                        | 0.0077        |
|                                           | HFD AAV8-hAAT-FGF21 5x10 <sup>10</sup> vg | <0.0001       |
|                                           | <b>vs HFD AAV8-hAAT-null</b>              | <b>IGFBP1</b> |
|                                           | HFD AAV8-hAAT-FGF21 5x10 <sup>10</sup> vg | ns            |

ns, non-significant

**Table S26. Appendix Figure S2 C, D, E**

| Young adults | vs chow AAV8-hAAT-null                    | F4/80   | CD 68  | TNF- $\alpha$ |
|--------------|-------------------------------------------|---------|--------|---------------|
|              | HFD AAV8-hAAT-null                        | <0.0001 | 0.0005 | <0.0001       |
|              | HFD AAV8-hAAT-FGF21 5x10 <sup>10</sup> vg | ns      | 0.001  | 0.008         |

ns, non-significant

**Table S27. Appendix Figure S3 A**

| Young adults | vs chow AAV8-hAAT-null                    | Day    | Night  |
|--------------|-------------------------------------------|--------|--------|
|              | HFD AAV8-hAAT-null                        | 0.0002 | 0.0025 |
|              | HFD AAV8-hAAT-FGF21 1x10 <sup>10</sup> vg | ns     | ns     |
|              | HFD AAV8-hAAT-FGF21 5x10 <sup>10</sup> vg | 0.0004 | 0.0003 |
|              | vs HFD AAV8-hAAT-null                     | Day    | Night  |
|              | HFD AAV8-hAAT-FGF21 1x10 <sup>10</sup> vg | ns     | ns     |
|              | HFD AAV8-hAAT-FGF21 5x10 <sup>10</sup> vg | 0.0003 | 0.0002 |

ns, non-significant

**Table S28. Appendix Figure S3 C**

| Young adults | vs chow AAV8-hAAT-null                    | RyR2   |
|--------------|-------------------------------------------|--------|
|              | HFD AAV8-hAAT-null                        | ns     |
|              | HFD AAV8-hAAT-FGF21 1x10 <sup>10</sup> vg | ns     |
|              | HFD AAV8-hAAT-FGF21 5x10 <sup>10</sup> vg | 0.0023 |
|              | vs HFD AAV8-hAAT-null                     | RyR2   |
|              | HFD AAV8-hAAT-FGF21 1x10 <sup>10</sup> vg | ns     |
|              | HFD AAV8-hAAT-FGF21 5x10 <sup>10</sup> vg | ns     |
| Adults       | vs chow AAV8-hAAT-null                    | RyR2   |
|              | HFD AAV8-hAAT-null                        | 0.0021 |
|              | HFD AAV8-hAAT-FGF21 1x10 <sup>10</sup> vg | 0.0017 |
|              | HFD AAV8-hAAT-FGF21 2x10 <sup>10</sup> vg | 0.0193 |
|              | HFD AAV8-hAAT-FGF21 5x10 <sup>10</sup> vg | 0.0112 |
|              | vs HFD AAV8-hAAT-null                     | RyR2   |
|              | HFD AAV8-hAAT-FGF21 1x10 <sup>10</sup> vg | ns     |
|              | HFD AAV8-hAAT-FGF21 2x10 <sup>10</sup> vg | ns     |
|              | HFD AAV8-hAAT-FGF21 5x10 <sup>10</sup> vg | ns     |

ns, non-significant

**Table S29. Appendix Figure S5 D, E, F H, I**

| vs AAV8-hAAT-null                     | F4/80   | TNF- $\alpha$ | Liver   | TG      | Cholesterol |
|---------------------------------------|---------|---------------|---------|---------|-------------|
| AAV8-hAAT-FGF21 1x10 <sup>11</sup> vg | <0.0001 | 0.0236        | <0.0001 | <0.0001 | 0.0002      |
| AAV8-hAAT-FGF21 5x10 <sup>11</sup> vg | <0.0001 | 0.0231        | <0.0001 | <0.0001 | 0.0275      |

**Table S30. Appendix Figure S6 A**

| vs AAV8-hAAT-null                     | PEPCK  |
|---------------------------------------|--------|
| AAV8-hAAT-FGF21 1x10 <sup>11</sup> vg | 0.0002 |
| AAV8-hAAT-FGF21 5x10 <sup>11</sup> vg | ns     |

ns, non-significant

**Table S31. Appendix Figure S6 C**

| vs AAV8-hAAT-null                     | eWAT | iWAT   | iBAT   |
|---------------------------------------|------|--------|--------|
| AAV8-hAAT-FGF21 1x10 <sup>11</sup> vg | ns   | 0.0002 | 0.0306 |
| AAV8-hAAT-FGF21 5x10 <sup>11</sup> vg | ns   | 0.0003 | ns     |

ns, non-significant

**Table S32. Appendix Figure S6 D**

| vs AAV8-hAAT-null                     | eWAT    | iWAT   | iBAT   |
|---------------------------------------|---------|--------|--------|
| AAV8-hAAT-FGF21 1x10 <sup>11</sup> vg | 0.0203  | ns     | 0.0006 |
| AAV8-hAAT-FGF21 5x10 <sup>11</sup> vg | <0.0001 | 0.0013 | 0.0112 |

ns, non-significant

**Table S33. Appendix Figure S6 E**

| vs AAV8-hAAT-null                     | eWAT | iWAT | iBAT   |
|---------------------------------------|------|------|--------|
| AAV8-hAAT-FGF21 1x10 <sup>11</sup> vg | ns   | ns   | 0.0006 |
| AAV8-hAAT-FGF21 5x10 <sup>11</sup> vg | ns   | ns   | 0.0338 |

ns, non-significant

**Table S34. Appendix Figure S6 F**

| vs AAV8-hAAT-null                     | eWAT | iWAT | iBAT   |
|---------------------------------------|------|------|--------|
| AAV8-hAAT-FGF21 1x10 <sup>11</sup> vg | ns   | ns   | 0.0034 |
| AAV8-hAAT-FGF21 5x10 <sup>11</sup> vg | ns   | ns   | 0.0255 |

ns, non-significant

**Table S35. Appendix Figure S6 G**

| vs AAV8-hAAT-null                     | UCP1   |
|---------------------------------------|--------|
| AAV8-hAAT-FGF21 1x10 <sup>11</sup> vg | ns     |
| AAV8-hAAT-FGF21 5x10 <sup>11</sup> vg | 0.0035 |

ns, non-significant

**Table S36. Appendix Figure S7 A, D, E, F**

| <b>vs AAV8-CAG-null</b>                    | <b>Adiponectin</b> | <b>F4/80</b> | <b>Liver</b> | <b>TG</b> | <b>Cholesterol</b> |
|--------------------------------------------|--------------------|--------------|--------------|-----------|--------------------|
| AAV8-CAG-FGF21-dmiRT 1x10 <sup>10</sup> vg | ns                 | ns           | ns           | ns        | ns                 |
| AAV8-CAG-FGF21-dmiRT 5x10 <sup>10</sup> vg | 0.0008             | ns           | 0.0013       | ns        | ns                 |
| AAV8-CAG-FGF21-dmiRT 2x10 <sup>11</sup> vg | 0.0053             | ns           | 0.0008       | 0.0188    | ns                 |
| AAV8-CAG-FGF21-dmiRT 1x10 <sup>12</sup> vg | <0.0001            | 0.0113       | <0.0001      | 0.0023    | 0.0129             |

ns, non-significant
