# Supplementary material for: FGF21 gene therapy as treatment for obesity and insulin resistance
Source: PubMed Central journal article supplement (PMC6079533; doi:10.15252/emmm.201708791), 2018-07-09

# Source Data Figure 3E

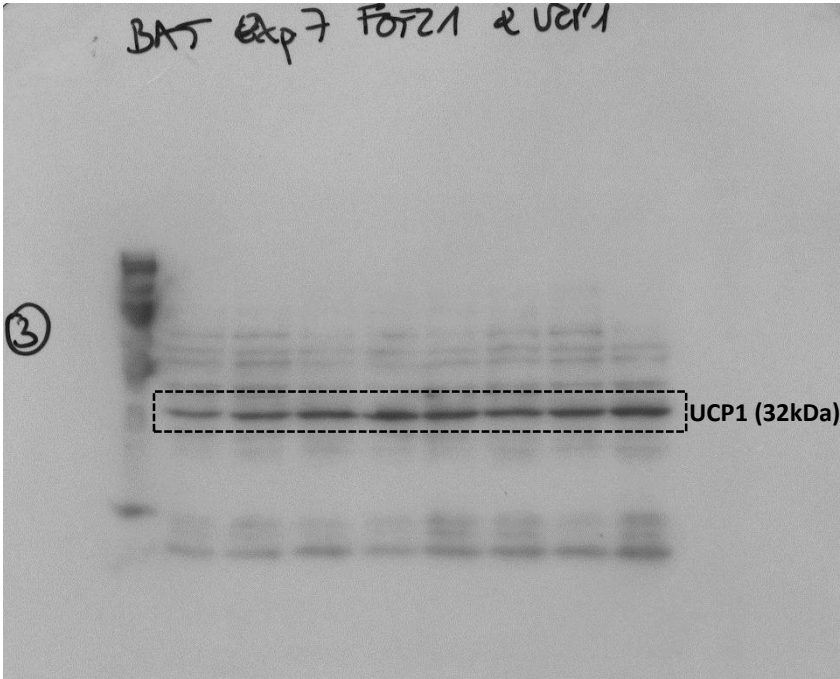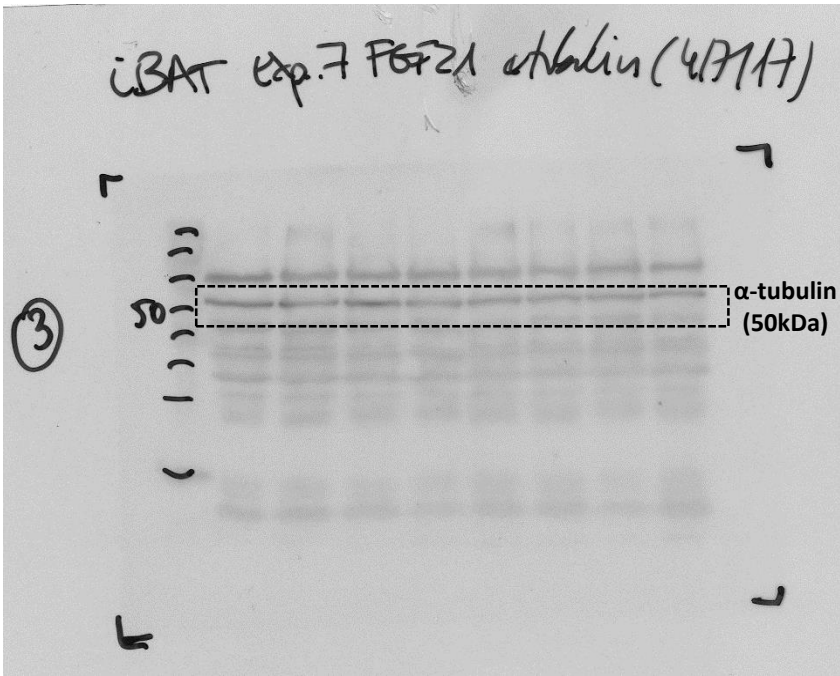

Supplement: EMMM-10-e8791-s003.pdf [file EMMM-10-e8791-s003.pdf]
